# Supplementary material
Source: MDPI journal article supplement (https://www.mdpi.com/2410-3888/9/5/149)
Supplement: s1 [file s1]

# Supplementary Materials:

**Table S1.** Detailed Environmental Disturbance Score – EDS and F-MMIP-LR classification per site. Coordinate system: World Geodetic System 1984. LAT – Latitude, LNG – Longitude; Total P – Total Phosphorus; Total N – Total Nitrogen.

| Site code | LAT    | LNG    | Agricultural land use | Artificial land use | Total P | Total N | Channel morphology | Flow regulation | EDS score | F-MMIP-LR |
|-----------|--------|--------|-----------------------|---------------------|---------|---------|--------------------|-----------------|-----------|-----------|
| MI1       | 42.107 | -8.297 | 2                     | 1                   | 1       | 1       | 2                  | 3               | 10        | 0.775     |
| MI2       | 42.080 | -8.406 | 2                     | 1                   | 1       | 1       | 1                  | 2               | 8         | 0.610     |
| MI3       | 42.079 | -8.496 | 2                     | 1                   | 1       | 2       | 3                  | 2               | 11        | 0.480     |
| MI4       | 42.051 | -8.617 | 3                     | 2                   | 1       | 1       | 2                  | 2               | 11        | 0.303     |
| MI5       | 42.040 | -8.643 | 3                     | 2                   | 1       | 3       | 3                  | 2               | 14        | 0.498     |
| MI6       | 42.018 | -8.657 | 3                     | 2                   | 1       | 2       | 2                  | 2               | 12        | 0.070     |
| MI7       | 41.940 | -8.750 | 3                     | 2                   | 1       | 1       | 3                  | 2               | 12        | 0.258     |
| TE1       | 39.479 | -8.108 | 2                     | 1                   | 2       | 1       | 1                  | 4               | 11        | 0.853     |
| TE2       | 39.453 | -8.187 | 2                     | 1                   | 2       | 2       | 2                  | 4               | 13        | 0.018     |
| TE3       | 39.477 | -8.332 | 2                     | 2                   | 2       | 2       | 3                  | 4               | 15        | 0.190     |
| TE4       | 39.463 | -8.382 | 2                     | 1                   | 1       | 2       | 1                  | 4               | 11        | 0.405     |
| TE5       | 39.302 | -8.584 | 4                     | 1                   | 2       | 2       | 1                  | 4               | 14        | 0.575     |
| TE6       | 39.080 | -8.756 | 4                     | 1                   | 2       | 2       | 2                  | 2               | 13        | 0.348     |
| TE7       | 39.049 | -8.805 | 4                     | 1                   | 2       | 2       | 3                  | 2               | 14        | 0.520     |
| GU1       | 38.832 | -7.084 | 4                     | 2                   | 2       | 3       | 2                  | 1               | 14        | 0.160     |
| GU2       | 38.106 | -7.639 | 4                     | 1                   | 1       | 2       | 4                  | 3               | 15        | 0.068     |
| GU3       | 37.898 | -7.646 | 4                     | 1                   | 1       | 4       | 3                  | 2               | 15        | 0.025     |
| GU4       | 37.720 | -7.636 | 3                     | 1                   | 2       | 2       | 1                  | 1               | 10        | 0.905     |
| GU5       | 37.694 | -7.654 | 3                     | 1                   | 1       | 2       | 3                  | 2               | 12        | 0.273     |
| GU6       | 37.647 | -7.651 | 3                     | 1                   | 1       | 2       | 3                  | 2               | 12        | 0.183     |
| GU7       | 37.632 | -7.665 | 3                     | 1                   | 2       | 2       | 1                  | 1               | 10        | 0.900     |
